# Supplementary material for: Optimization of Y-90 Radioembolization Imaging for Post-Treatment Dosimetry on a Long Axial Field-of-View PET/CT Scanner
Source: MDPI journal article supplement (doi:10.3390/diagnostics13223418), 2023-11-09
Supplement: s1 [file s1]

**Supplementary Table S1.** CRC values for the AbdoMan phantom for 0, 2, 4, 6, 8 mm filter and acquisition time of 30 min.

| Filter FWHM<br>[mm] | Contrast Recovery Coefficients |    |    |    |
|---------------------|--------------------------------|----|----|----|
|                     | Sphere Size [mm]               |    |    |    |
|                     | 50                             | 40 | 30 | 20 |
| 0                   | 73                             | 64 | 59 | 54 |
| 2                   | 73                             | 64 | 58 | 52 |
| 4                   | 72                             | 63 | 57 | 51 |
| 6                   | 72                             | 63 | 57 | 51 |
| 8                   | 72                             | 63 | 57 | 51 |

**Supplementary Table S2.** Mean absorbed doses in liver VOIs (30 mm sphere) for every patient for all studied reconstruction parameter sets (2i5s-4i5s, 20 and 30 min, filter sizes 0, 2, 4, 6 mm).

| Mean Absorbed Dose in Liver VOI [Gy] |                  |            |      |      |      |      |      |      |      |      |
|--------------------------------------|------------------|------------|------|------|------|------|------|------|------|------|
| Acquisition Time [min]               | Filter FWHM [mm] | Iterations | ID 1 | ID 2 | ID 3 | ID 4 | ID 5 | ID 6 | ID 7 | ID 8 |
| 30                                   | 0                | 2i5s       | 55.7 | 57.2 | 46.4 | 36.0 | 45.3 | 27.6 | 42.4 | 18.6 |
|                                      | 0                | 3i5s       | 56.2 | 57.2 | 46.3 | 35.8 | 45.1 | 27.1 | 41.6 | 18.7 |
|                                      | 0                | 4i5s       | 56.0 | 57.8 | 46.3 | 35.8 | 45.1 | 27.4 | 41.1 | 18.6 |
|                                      | 2                | 2i5s       | 55.7 | 57.1 | 46.4 | 36.0 | 45.4 | 27.6 | 42.4 | 18.6 |
|                                      | 2                | 3i5s       | 56.1 | 57.0 | 46.3 | 35.8 | 45.2 | 27.2 | 41.6 | 18.7 |
|                                      | 2                | 4i5s       | 56.0 | 57.7 | 46.3 | 35.8 | 45.2 | 27.4 | 41.1 | 18.7 |
|                                      | 4                | 2i5s       | 55.6 | 57.0 | 46.4 | 36.0 | 45.4 | 27.7 | 42.4 | 18.7 |
|                                      | 4                | 3i5s       | 56.1 | 56.9 | 46.3 | 35.8 | 45.2 | 27.2 | 41.7 | 18.8 |
|                                      | 4                | 4i5s       | 55.9 | 57.5 | 46.3 | 35.8 | 45.3 | 27.4 | 41.2 | 18.7 |
|                                      | 6                | 2i5s       | 55.6 | 57.0 | 46.4 | 36.0 | 45.4 | 27.7 | 42.4 | 18.7 |
|                                      | 6                | 3i5s       | 56.0 | 56.8 | 46.3 | 35.8 | 45.2 | 27.2 | 41.7 | 18.8 |
|                                      | 6                | 4i5s       | 55.9 | 57.4 | 46.3 | 35.8 | 45.2 | 27.4 | 41.2 | 18.7 |
| 20                                   | 0                | 2i5s       | 55.0 | 56.6 | 46.2 | 36.0 | 44.6 | 27.5 | 42.1 | 18.9 |
|                                      | 0                | 3i5s       | 54.8 | 56.9 | 46.0 | 36.0 | 44.4 | 27.1 | 41.3 | 19.0 |
|                                      | 0                | 4i5s       | 55.3 | 57.1 | 45.9 | 36.0 | 44.4 | 27.3 | 40.7 | 19.0 |
|                                      | 2                | 2i5s       | 55.0 | 56.5 | 46.2 | 36.0 | 44.7 | 27.5 | 42.1 | 18.9 |
|                                      | 2                | 3i5s       | 54.8 | 56.8 | 46.0 | 36.0 | 44.4 | 27.1 | 41.3 | 19.0 |
|                                      | 2                | 4i5s       | 55.2 | 57.0 | 46.0 | 36.0 | 44.4 | 27.3 | 40.8 | 19.0 |
|                                      | 4                | 2i5s       | 54.9 | 56.4 | 46.2 | 36.0 | 44.7 | 27.6 | 42.2 | 18.9 |
|                                      | 4                | 3i5s       | 54.8 | 56.7 | 46.0 | 36.0 | 44.5 | 27.1 | 41.4 | 19.0 |
|                                      | 4                | 4i5s       | 55.2 | 56.9 | 46.0 | 36.0 | 44.5 | 27.3 | 40.9 | 19.1 |
|                                      | 6                | 2i5s       | 54.9 | 56.4 | 46.2 | 36.0 | 44.8 | 27.6 | 42.2 | 18.9 |
|                                      | 6                | 3i5s       | 54.8 | 56.7 | 46.0 | 36.0 | 44.5 | 27.1 | 41.4 | 19.0 |
|                                      | 6                | 4i5s       | 55.2 | 56.9 | 46.0 | 36.0 | 44.5 | 27.3 | 40.9 | 19.1 |

**Supplementary Table S3.** Mean absorbed doses in tumor VOIs (30 mm sphere) for every patient for all studied reconstruction parameter sets (2i5s-4i5s, 20 and 30 min, filter sizes 0, 2, 4, 6 mm)

| Mean Absorbed Dose in Tumor VOI [Gy] |                  |            |        |       |       |      |       |       |       |       |
|--------------------------------------|------------------|------------|--------|-------|-------|------|-------|-------|-------|-------|
| Acquisition Time [min]               | Filter FWHM [mm] | Iterations | ID 1   | ID 2  | ID 3  | ID 4 | ID 5  | ID 6  | ID 7  | ID 8  |
| 30                                   | 0                | 2i5s       | 1156.9 | 126.2 | 664.6 | 84.7 | 209.1 | 470.2 | 197.5 | 217.2 |
|                                      | 0                | 3i5s       | 1156.5 | 125.9 | 665.2 | 85.4 | 211.7 | 464.3 | 199.9 | 219.6 |
|                                      | 0                | 4i5s       | 1157.0 | 126.4 | 664.7 | 85.6 | 212.4 | 462.0 | 200.7 | 220.5 |
|                                      | 2                | 2i5s       | 1150.0 | 125.6 | 661.9 | 84.6 | 208.1 | 469.5 | 196.3 | 216.6 |
|                                      | 2                | 3i5s       | 1149.6 | 125.3 | 662.5 | 85.2 | 210.5 | 463.7 | 198.6 | 219.0 |
|                                      | 2                | 4i5s       | 1149.9 | 125.9 | 662.1 | 85.4 | 211.3 | 461.3 | 199.5 | 219.8 |
|                                      | 4                | 2i5s       | 1140.6 | 124.8 | 658.1 | 84.3 | 206.6 | 468.5 | 194.8 | 215.7 |
|                                      | 4                | 3i5s       | 1140.1 | 124.6 | 658.8 | 85.0 | 209.0 | 462.8 | 197.0 | 218.1 |
|                                      | 4                | 4i5s       | 1140.4 | 125.1 | 658.4 | 85.2 | 209.7 | 460.5 | 197.8 | 218.9 |
|                                      | 6                | 2i5s       | 1138.8 | 124.6 | 657.3 | 84.3 | 206.3 | 468.3 | 194.4 | 215.5 |
|                                      | 6                | 3i5s       | 1138.3 | 124.4 | 658.1 | 84.9 | 208.7 | 462.6 | 196.7 | 217.9 |
|                                      | 6                | 4i5s       | 1138.5 | 125.0 | 657.7 | 85.1 | 209.4 | 460.3 | 197.4 | 218.7 |
| 20                                   | 0                | 2i5s       | 1156.7 | 127.4 | 673.5 | 84.2 | 210.6 | 478.8 | 196.5 | 217.5 |
|                                      | 0                | 3i5s       | 1157.7 | 127.1 | 674.1 | 84.9 | 213.2 | 473.1 | 198.8 | 220.4 |
|                                      | 0                | 4i5s       | 1157.7 | 127.3 | 673.6 | 85.1 | 214.0 | 470.7 | 199.7 | 221.5 |
|                                      | 2                | 2i5s       | 1149.8 | 126.8 | 670.8 | 84.0 | 209.4 | 477.9 | 195.3 | 216.9 |
|                                      | 2                | 3i5s       | 1150.6 | 126.5 | 671.4 | 84.6 | 212.0 | 472.3 | 197.6 | 219.7 |
|                                      | 2                | 4i5s       | 1150.6 | 126.8 | 671.0 | 84.9 | 212.8 | 470.0 | 198.4 | 220.7 |
|                                      | 4                | 2i5s       | 1140.3 | 125.9 | 667.0 | 83.7 | 207.9 | 476.7 | 193.8 | 216.0 |
|                                      | 4                | 3i5s       | 1140.9 | 125.7 | 667.7 | 84.3 | 210.3 | 471.2 | 195.9 | 218.8 |
|                                      | 4                | 4i5s       | 1140.9 | 126.0 | 667.3 | 84.5 | 211.1 | 468.9 | 196.6 | 219.7 |
|                                      | 6                | 2i5s       | 1138.5 | 125.8 | 666.2 | 83.7 | 207.6 | 476.5 | 193.5 | 215.8 |
|                                      | 6                | 3i5s       | 1139.0 | 125.6 | 666.9 | 84.3 | 210.0 | 471.0 | 195.6 | 218.6 |
|                                      | 6                | 4i5s       | 1139.0 | 125.9 | 666.6 | 84.5 | 210.7 | 468.7 | 196.3 | 219.5 |
